# Supplementary material
Source: Research Square preprint supplement (doi:10.21203/rs.3.rs-9180007/v1)
Supplement: Supplementary file 1 [file bda4d1d40f2c47811599bd44.docx]

Table 1. Sociodemographic and Clinical Characteristics of the SCIMS Cohort

| **Characteristic** |  |
| --- | --- |
| ***Demographic variables*** |  |
| Age at injury, years, mean ± SD | 48.6 ± 17.1 |
| Sex, n (%) |  |
| Male | 982 (77.0) |
| Female | 293 (23.0) |
| Race, n (%) |  |
| White | 889 (70.6) |
| Black/African American | 284 (22.5) |
| Asian or Pacific Islander | 37 (2.9) |
| Some other race/Multiracial | 42 (3.3) |
| Missing | 16 |
| Ethnicity, n (%) |  |
| Hispanic or Latino | 135 (10.7) |
| Non-Hispanic/Latino | 1,125 (89.3) |
| Missing | 15 |
| **Injury characteristics** |  |
| AIS grade at admission, n (%) |  |
| A | 227 (17.8) |
| B | 160 (12.5) |
| C | 223 (17.5) |
| D | 658 (51.6) |
| U | 7 (0.5) |
| Neurological level of injury (NLI), n (%) |  |
| C1 | 79 (6.4) |
| C2 | 108 (8.8) |
| C3 | 164 (13.4) |
| C4 | 474 (38.8) |
| C5 | 234 (19.1) |
| C6 | 105 (8.6) |
| C7 | 38 (3.1) |
| C8 | 18 (1.4) |
| T1 | 1 |
| Missing | 54 |
| **Rehabilitation timing** |  |
| Days from injury to rehab admission, mean ± SD (range) | 23.5 ± 22.9 (min and max range 0–211 days) |
| Days from injury to rehab discharge, mean ± SD (range) | 72.9 ± 41.0 (min and max range 8–336 days) |

Table 1. Demographic and Clinical Characteristics of the SCIMS Cohort. Data presented as mean ± standard deviation (SD) or number (%). Percentages calculated based on available data. AIS = American Spinal Injury Association Impairment Scale; NLI = neurological level of injury.

Table 2. Proportion of Myotome Conversions between Admission and Discharge (N=1,275 participants; 10 myotomes per participant)

| Myotome | Low Conversion (%) | | High Conversion (%) | | No Conversion (%) | | Total Myotomes (n) | |
| --- | --- | --- | --- | --- | --- | --- | --- | --- |
| SIDE | RIGHT | LEFT | RIGHT | LEFT | RIGHT | LEFT | RIGHT | LEFT |
| C5 | 33/89 (37) | 28/87 (32.2) | 14/89 (15.7) | 17/87 (19.5) | 41/89 (46.1) | 42/87 (48.3) | 89 | 87 |
| C6 | 112/282 (39.7) | 110/269 (40.9) | 42/282 (14.9) | 33/269 (12.3) | 127/282 (45) | 125/269 (46.5) | 282 | 269 |
| C7 | 140/406 (34.5) | 126/401 (31.4) | 54/406 (13.3) | 56/401 (13.9) | 211/406 (51.9) | 217/401 (54.1) | 406 | 401 |
| C8 | 143/645 (22.2) | 141/638 (22.1) | 91/645 (14.1) | 90/638 (14.1) | 406/645 (62.9) | 402/638 (63.1) | 645 | 638 |
| T1 | 156/734 (21.2) | 165/726 (22.7) | 94/734 (12.8) | 91/726 (12.2) | 480/734 (65.4) | 466/726 (64.2) | 734 | 726 |

Table 2. Proportion of Myotome Conversions between Admission and Discharge (N=1,275 participants; 10 myotomes per participant). Percentages represent proportions of myotomes demonstrating low, high, or no MC-0 conversions among those with baseline motor score = 0 at admission. Values are displayed as n/N (%). The majority of recovered myotomes exhibited low-grade conversion (0→1 or 0→2), reflecting partial reinnervation or early axonal sprouting. Low conversions accounted for 37–41% of initially paralyzed proximal segments but declined to 21–23% at the most distal levels. In comparison, high conversions (0→3–5), indicative of functionally meaningful antigravity strength, were less frequent overall: 13–15% across segments and comprised roughly one-third of all recovered myotomes. The overall low-to-high conversion ratio of ~2.5: 1 underscores the predominance of partial motor returnduring the inpatient rehabilitation phase.

Table 3. Proportion of Myotome Conversion Events by NLI between Admission and Discharge.

| # events of MC-0 | | | | | | |
| --- | --- | --- | --- | --- | --- | --- |
| NLI | No conversion | | Low conversion | | High conversion | |
| Right | Left | Right | Left | Right | Left |
| C4  n=1087(R)  n=1082(L) | 682 (62.7%) | 636 (68.7%) | 198 (18.2%) | 293 (27%) | 132 (12.1%) | 152 (14%) |
| C5  n=282 (R)  n=246(L) | 172 (60.9%) | 150 (60.9%) | 65 (23%) | 58 (23.5%) | 45 (15.9%) | 38 (15.4%) |
| C6  n=130 (R)  n=129(L) | 87 (66.9%) | 74 (57.3%) | 27 (20.7%) | 36 (27.9%) | 16 (12.3%) | 19 (14.7%) |
| C7  n=21 (R)  n=23(L) | 5 (23.8%) | 8 (34.7%) | 12 (57.1%) | 10 (43.4%) | 4 (19%) | 5 (21.7%) |

Table 3. Proportion of Myotome Conversion Events by NLI between Admission and Discharge. The percentages represent the proportion of myotome conversion events by neurological level of injury (NLI), categorized as no conversion, low conversion, or high conversion of myotomes from 0 (MC-0) among those with a baseline motor score of 0 at admission. Values are presented as n/N (%). As expected, higher NLIs were associated with a greater number of myotomes with a baseline motor score of 0. Across NLIs C4–C6, no conversion occurred in more than 55% of myotomes. Low conversion events ranged from 18.2% to 27.9% for C4–C6 and increased to over 40% at C7, although with a smaller sample size. High conversion events ranged from 12.1% to 15.9% for C4–C6 and showed a slight increase at C7 (19–21.7%), again with a notably smaller sample size.

Table 4**. Distribution of Individual-Level MC-0 Categories and Pooled UEMS Change Categories by Neurological Level of Injury (NLI), Admission-to-Discharge Analysis.**

| NLI | N Analyzed | MC-0 None (0) | MC-0 Low-only (1–2) | MC-0 High (≥3) | UEMS Low  <2.98 | UEMS Moderate  2-98-7.49 | UEMS High  >7.49 |
| --- | --- | --- | --- | --- | --- | --- | --- |
| C4 | 374 | 32.6% | 36.9% | 30.5% | 32.1% | 27.3% | 40.6% |
| C5 | 139 | 32.4% | 33.1% | 34.5% | 29.5% | 29.5% | 41.0% |
| C6 | 69 | 31.9% | 37.7% | 30.4% | 39.1% | 37.7% | 23.2% |
| C7 | 16 | 6.2% | 50.0% | 43.8% | 18.8% | 56.2% | 25.0% |
| C8 | 0 | NA | NA | NA | NA | NA | NA |

Table 4. **Distribution of Individual-Level MC-0 Categories and Pooled UEMS Change Categories by Neurological Level of Injury (NLI), Admission-to-Discharge Analysis.**. UEMS categories were defined using previously reported distribution-based thresholds for clinically meaningful change: low (<2.98), moderate (2.98–7.49), and substantial (>7.49). Values are percentages within each NLI stratum among participants eligible for MC-0 analysis and with non-missing admission and discharge UEMS.
