# Supplementary material
Source: Research Square preprint supplement (doi:10.21203/rs.3.rs-9180007/v1)
Supplement: Supplementary file 2 [file ddab91e3ff4a6fc8c8ea3de8.pdf]

Supplemental material

Table 1. AIS Grade Changes between Inpatient Admission and Discharge.

| AIS Grade Transition between Admission and Discharge |                |                     |                         |                           |
|------------------------------------------------------|----------------|---------------------|-------------------------|---------------------------|
| Admission AIS Grade                                  | N (# patients) | No Grade Change (%) | 1-Grade Improvement (%) | ≥ 2-Grade Improvement (%) |
| A                                                    | 275            | 208 (75.6)          | 44 (16)                 | 23 (8.4)                  |
| B                                                    | 175            | 94 (53.7)           | 64 (36.6)               | 10 (5.7)                  |
| C                                                    | 307            | 124 (40.4)          | 165 (53.8)              | --                        |
| D                                                    | 468            | 459 (98.1)          |                         | --                        |
| U                                                    | 50             | --                  | --                      | --                        |
| Total                                                | 1,275          | --                  | --                      | --                        |

Table 1. AIS Grade Changes between Inpatient Admission and Discharge. Rows = AIS grade at admission; columns, percentages reflect the proportion of individuals in each admission group who experienced the specified degree of AIS grade improvement between admission and discharge.

“--” = no instances observed. A–D = AIS grades; U = Unknown.

Table 2. Myotome Conversions Among Participants with **No-change in AIS Classification** from Admission to Discharge

| Myotome          | Low Conversion (%) |               | High Conversion (%) |             | No Conversion (%) |                | Total Myotomes (n) |      |
|------------------|--------------------|---------------|---------------------|-------------|-------------------|----------------|--------------------|------|
| <b>AIS A → A</b> | RIGHT              | LEFT          | RIGHT               | LEFT        | RIGHT             | LEFT           | RIGHT              | LEFT |
| C5               | 4/31 (12.9)        | 5/30 (16.7)   | 3/31 (9.6)          | 4/30 (13.3) | 24/31 (77.4)      | 21/30 (70.0)   | 31                 | 30   |
| C6               | 17/75 (22.7)       | 20/77 (25.9)  | 3/75 (4.0)          | 2/77 (2.6)  | 55/75 (73.3)      | 55/77 (71.4)   | 75                 | 77   |
| C7               | 24/122 (19.6)      | 28/124 (22.6) | 4/122 (3.3)         | 2/124 (1.6) | 93/122 (76.2)     | 93/124 (75)    | 122                | 124  |
| C8               | 13/180 (7.2)       | 5/180 (2.8)   | 6/180 (3.3)         | 4/180 (2.2) | 161/180 (89.4)    | 170/180 (94.4) | 180                | 180  |
| T1               | 9/186 (4.8)        | 5/186 (2.7)   | 1/186 (0.5)         | 5/186 (2.7) | 176/186 (94.6)    | 175/186 (94.1) | 186                | 186  |
| <b>AIS B → B</b> | RIGHT              | LEFT          | RIGHT               | LEFT        | RIGHT             | LEFT           | RIGHT              | LEFT |
| C5               | 2/9 (22.2)         | 1/4 (25.0)    | 1/9 (11.1)          | 3/4 (75.0)  | 6/9 (66.7)        | 0/0 (0.0)      | 9                  | 4    |
| C6               | 11/32 (34.4)       | 9/31 (29.0)   | 1/32 (3.1)          | 1/31 (3.2)  | 20/32 (62.5)      | 21/31 (67.7)   | 32                 | 31   |
| C7               | 5/5 (100)          | 6/7 (85.7)    | 0/5 (0.0)           | 0/7 (0.0)   | 0/5 (0.0)         | 1/7 (14.3)     | 5                  | 7    |
| C8               | 13/76 (17.1)       | 14/78 (17.9)  | 1/76 (1.3)          | 2/78 (2.6)  | 62/76 (81.6)      | 62/78 (79.5)   | 76                 | 78   |
| T1               | 5/80 (6.3)         | 7/79 (8.9)    | 3/80 (3.8)          | 1/79 (1.3)  | 72/80 (90)        | 71/79 (89.8)   | 80                 | 79   |
| <b>AIS C → C</b> | RIGHT              | LEFT          | RIGHT               | LEFT        | RIGHT             | LEFT           | RIGHT              | LEFT |
| C5               | 0/0 (0)            | 9/17 (52.9)   | 0/0 (0)             | 1/17 (5.8)  | 0/0 (0)           | 7/17 (41.1)    | 0                  | 17   |
| C6               | 21/43 (48.8)       | 24/43 (55.8)  | 3/43 (6.9)          | 3/43 (6.9)  | 19/43 (44.1)      | 16/43 (37.2)   | 43                 | 43   |
| C7               | 32/62 (51.6)       | 34/65 (52.3)  | 4/62 (6.4)          | 7/65 (10.7) | 26/62 (41.9)      | 24/65 (36.9)   | 62                 | 65   |
| C8               | 36/86 (41.8)       | 38/87 (43.6)  | 2/86 (2.3)          | 5/87 (5.7)  | 48/86 (55.8)      | 44/87 (50.5)   | 86                 | 87   |
| T1               | 29/95 (30.5)       | 37/94 (39.3)  | 2/95 (2.1)          | 2/94 (2.1)  | 64/95 (67.3)      | 55/94 (58.5)   | 95                 | 94   |

Table 2. Myotome Conversions Among Participants with **No-change in AIS Classification** from Admission to Discharge. Values show the proportion of myotomes with low (0→1–2), high (0→≥3), or no recovery (remained 0) between admission and discharge for individuals who show no-change in AIS grade. Data demonstrate segmental motor improvement despite unchanged AIS grade, highlighting the sensitivity of myotome-level metrics for detecting early recovery.
